# Supplementary material
Source: Springer Nature journal article supplement (https://www.springermedizin.de/resource/supplementary/12882_2012_415_MOESM4_ESM.pdf/9453528)

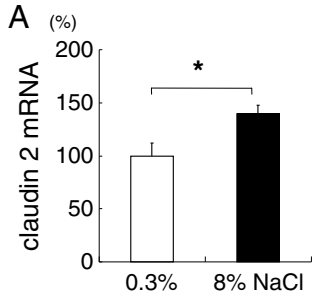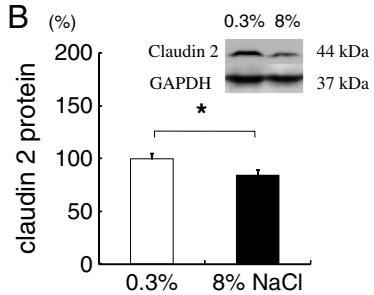

**C**

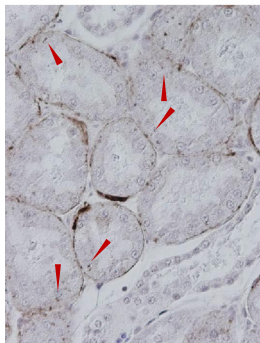

**D**

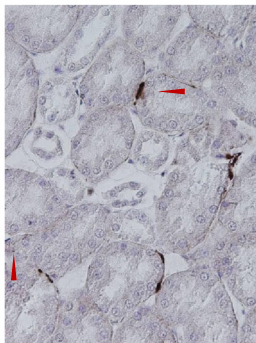

**E**

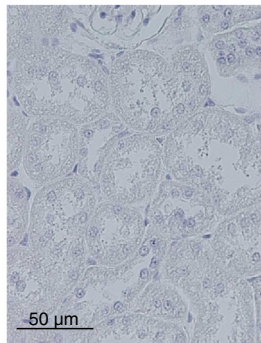

Supplement: MOESM4 [file 9453528]
